# Supplementary material
Source: PubMed Central journal article supplement (PMC3233045)
Supplement: supp_77.23.8288_Argyros_et_al_appendix.pdf [file supp_77.23.8288_Argyros_et_al_appendix.pdf]

Fig. A1

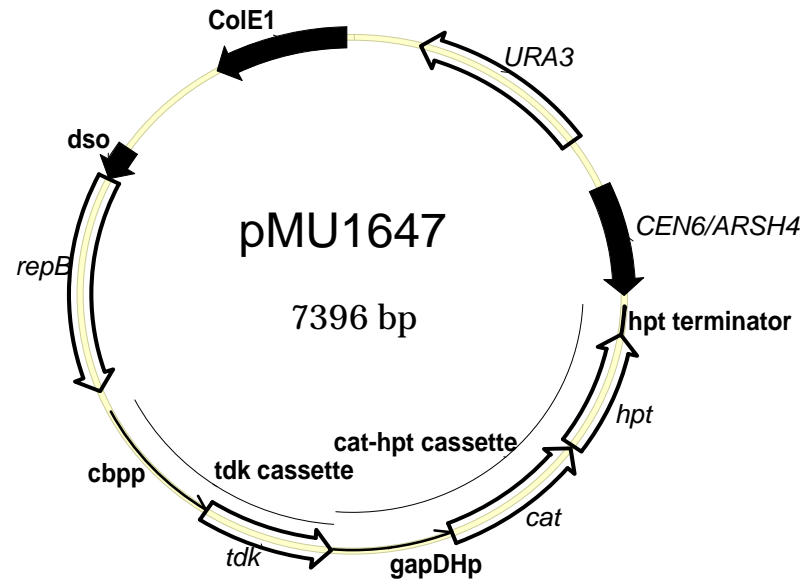

Table A1. Phenotype of counter selections contained on pMU1647 expressed as *C. thermocellum* colony forming units.

| Strain                 | colony forming units |                   |                   |
|------------------------|----------------------|-------------------|-------------------|
|                        | No Drug              | +AZH              | +FUDR             |
| wt                     | $6.0 \times 10^8$    | $4.4 \times 10^2$ | $2.8 \times 10^8$ |
| wt + pMU1647           | $1.3 \times 10^8$    | n.d.              | $5.0 \times 10^6$ |
| $\Delta hpt$           | $6.0 \times 10^8$    | $9.0 \times 10^8$ | n.d.              |
| $\Delta hpt$ + pMU1647 | $4.0 \times 10^8$    | $2.5 \times 10^2$ | n.d.              |

Cultures were grown to an OD<sub>600</sub> of 0.9 and dilution plated on the indicated medium. The cfu's reported resulted after 48 hours of incubation.

Table A2. Avicel fermentation products of *C. thermocellum* strains generated in this study<sup>a</sup>.

| Strains                                      | Products formed g/l |                   |                  |               |                  |                  | <sup>b</sup> Final D.W. g | <sup>c</sup> Theoretical ethanol yield g/l | % Carbon recovery |
|----------------------------------------------|---------------------|-------------------|------------------|---------------|------------------|------------------|---------------------------|--------------------------------------------|-------------------|
|                                              | Cellobiose          | Glucose           | Acetate          | Lactate       | Ethanol          | Pyruvate         |                           |                                            |                   |
| wt                                           | 2.1<br>+/- 0.01     | 2.81 +/-<br>0.16  | 2.74 +/-<br>0.03 | 2.49 +/- 0.02 | 1.32 +/-<br>0.04 | n.d.             | 1.9 +/- 0.14              | 9.07                                       | 72                |
| $\Delta hpt$                                 | 1.94<br>+/- 0.05    | 2.49 +/-<br>0.02  | 2.77 +/-<br>0.01 | 2.42 +/- 0.03 | 1.64 +/-<br>0.00 | n.d.             | 1.9 +/- 0.00              | 8.98                                       | 73                |
| $\Delta hpt, \Delta ldh$                     | 0.43<br>+/- 0.07    | 2.57 +/-<br>0.01  | 2.89 +/-<br>0.00 | 0.25 +/- 0.01 | 2.02 +/-<br>0.01 | n.d.             | 1.4 +/- 0.07              | 9.56                                       | 60                |
| $\Delta hpt, \Delta pta$                     | 0.97<br>+/- 0.01    | 0.018 +/-<br>0.00 | 0.22 +/-<br>0.06 | 3.93 +/- 0.01 | 2.02 +/-<br>0.02 | n.d.             | 0.6 +/- 0.00              | 10.39                                      | 45                |
| $\Delta hpt, \Delta ldh, \Delta pta$         | 0.50<br>+/- 0.01    | 0.16 +/-<br>0.00  | 0.02 +/-<br>0.08 | 0.35 +/- 0.03 | 2.56 +/-<br>0.01 | 0.31<br>+/- 0.02 | 1.15 +/- 0.21             | 9.33                                       | 33                |
| Evolved $\Delta hpt, \Delta ldh, \Delta pta$ | 0.53<br>+/- 0.00    | 0.06 +/-<br>0.01  | 0.16 +/-<br>0.04 | 0.11 +/- 0.01 | 5.61 +/-<br>0.14 | n.d.             | 1.1 +/- 0.14              | 9.39                                       | 61                |

<sup>a</sup> Duplicate batch fermentations with initial pH 7.0 and 19.5 g/l Avicel, maintained at 55°C, sampled at 72 h.

<sup>b</sup> D.W. stands for dry weight, and is used to determine residual Avicel and calculate Avicel conversion

<sup>c</sup> Based on Avicel conversion

n.d., not detected

Table A3. Avicel fermentation products of *C. thermocellum*-*T. saccharolyticum* co-cultures

| Co-culture                      | Products formed g/l |                  |                     |                     |                     |          | <sup>c</sup> Final D.W. g | <sup>d</sup> Theoretical ethanol yield g/l | % Carbon recovery |
|---------------------------------|---------------------|------------------|---------------------|---------------------|---------------------|----------|---------------------------|--------------------------------------------|-------------------|
|                                 | Cellobiose          | Glucose          | Acetate             | Lactate             | Ethanol             | Pyruvate |                           |                                            |                   |
| wt strains <sup>a</sup>         | 0.78 +/-<br>0.08    | 0.63 +/-<br>0.28 | 4.04<br>+/-<br>0.02 | 2.58<br>+/-<br>0.01 | 3.21<br>+/-<br>0.15 | n.d.     | 0.80 +/-<br>0.21          | 9.26                                       | 79                |
| Engineered strains <sup>a</sup> | 0.64 +/-<br>0.01    | 0.18 +/-<br>0.00 | 0.25<br>+/-<br>0.01 | 0.16<br>+/-<br>0.01 | 6.7 +/-<br>0.04     | n.d.     | 0.63 +/-<br>0.11          | 9.35                                       | 76                |
| Engineered strains <sup>b</sup> | 0.20                | n.d.             | 0.50                | 0.38                | 38.1                | n.d.     | 8.4                       | 47.5                                       | 82                |

<sup>a</sup> Duplicate batch fermentations with initial pH 6.75 and 17.2 g/l Avicel, maintained at 55°C, sampled at 120 h.

<sup>b</sup> Continuous stirred reactor fermentation (300 rpm) with initial pH 6.3 and 92.2 g/l Avicel, maintained at 55°C, sampled at 146 h.

<sup>c</sup> D.W., dry weight, and is used to determine residual Avicel and calculate Avicel conversion

<sup>d</sup> Based on Avicel conversion

n.d., not detected

## Appendix figure legends:

**Fig A1.** pMU1647. A *C. thermocellum*-*E.coli*-*S.cerevisiae* shuttle vector with positive and negative selections for genetic manipulation in *C. thermocellum*. Replication factors: ColE1, *E. coli* origin; *dso* and *repB*, gram+ double stranded origin of replication and replication initiation protein for *C. thermocellum*; *CEN6/ARSH4*, *S. cerevisiae* replication elements. *URA3* is used as a positive selection marker in *S. cerevisiae*. The *tdk* cassette is a negative selectable marker in *C. thermocellum* and is comprised of the *C. thermocellum* cellobiose phosphorylase promoter (*cbpp*) and the *T. saccharolyticum* thymidine kinase gene (*tdk*). The *cat-hpt* cassette is a dual selection marker, allowing positive and negative selection in *C. thermocellum* and positive selection in *E. coli* and is comprised of the *C. thermocellum* glyceraldehyde 3-phosphate dehydrogenase promoter (*gapDHp*), the *cat* gene from pNW33n, and the *hpt* gene from *C. thermocellum*.
